# Supplementary material for: Ultraconserved words point to deep language ancestry across Eurasia
Source: HighWire-hosted journal article supplement (doi:10.1073/pnas.1218726110), 2013-05-06
Supplement: st01.docx [file st01.docx]

**Table S1.** The table reports the maximal cognate class size in the Eurasiatic language families of each word in the Swadesh fundamental vocabulary list. (a) PIE: Proto Indo-European, (b) PU: Proto-Uralic, (c) PA: Proto-Altaic, (d) PK: Proto-Kartvelian, (e) PD: Proto-Dravidian, (f) PCK: Proto Chukchi-Kamchatkan, (g) PIY: Proto-Inuit-Yupik, (h) Max Cog Set is the size of the maximum cognate set for each lexical item (e.g., 7 in the first row for THOU indicates that the reconstructed forms for THOU are cognates across all 7 language families). A “?” indicates that no proto-word was reconstructed in the *LWED* for a word in a given language family due to uncertainty between the "daughter" forms or missing data. An asterix (*) indicates words the Swadesh word list items with a Max Cog Set of 1.

MEANING PIE(a) PU(b) PA(c) PK(d) PD(e) PCK(f) PIY(g) Max Cog Set(h)

ALL 1 0 0 0 1 0 1 3

ALL 1 1 0 0 1 0 0 3

ASHES 1 1 1 0 0 0 1 4

BACK 0 1 1 ? 1 0 0 3

BARK 1 1 1 0 0 0 1 4

BELLY 0 0 1 0 1 0 0 2

BELLY 0 1 0 0 1 0 0 2

BELLY 1 0 0 0 1 0 0 2

BELLY 1 0 0 1 0 0 0 2

BIG 0 0 0 1 1 0 0 2

BIG 0 0 1 0 0 1 0 2

BIG 0 0 1 0 1 0 0 2

BIG 0 1 0 0 0 0 1 2

BIRD 0 0 0 ? 1 1 0 2

BLACK 1 0 1 ? 1 ? 1 4

BLOOD 0 1 0 0 1 0 1 3

BLOOD 1 0 1 1 0 0 0 3

BONE 0 1 0 0 1 0 1 3

CHILD 0 0 1 0 1 0 0 2

CHILD 0 0 1 0 1 0 0 2

CHILD 0 1 1 0 0 0 0 2

CLOUD 0 0 1 0 0 0 1 2

CLOUD 0 1 1 0 0 0 0 2

CLOUD 1 0 0 0 0 0 1 2

CLOUD 1 1 0 0 0 0 0 2

COLD 0 0 1 0 1 0 1 3

COLD 0 1 1 0 1 0 0 3

DAY 1 0 0 1 0 0 0 2

DOG 0 1 0 1 0 0 1 3

DRY 0 1 1 0 0 1 0 3

DUST 0 0 1 1 1 ? 0 3

EAR 0 1 1 1 0 0 0 3

EARTH 1 0 0 1 1 0 ? 3

EGG 0 0 1 ? 1 0 0 2

EGG 0 0 1 ? 1 0 0 2

EGG 0 1 0 ? 0 0 1 2

EYE 0 0 1 0 1 0 0 2

FAT 0 0 1 0 1 0 0 2

FAT 0 0 1 1 0 0 0 2

FAT 1 0 0 1 0 0 0 2

FAT 1 1 0 0 0 0 0 2

FATHER 1 0 1 0 1 0 0 3

FEATHER 0 0 0 1 1 0 0 2

FEATHER 1 0 1 0 0 0 0 2

FIRE 1 1 0 0 0 1 1 4

FISH 1 0 1 0 0 0 1 3

FIVE 0 1 1 0 0 ? 0 2

FOG 0 1 1 ? 0 0 1 3

FOOT 0 1 1 1 0 0 0 3

FOOT 1 1 1 0 0 0 0 3

FOUR 0 1 0 0 1 0 0 2

GOOD 1 0 0 ? 0 0 1 2

GOOD 1 1 0 ? 0 0 0 2

GRASS 0 0 1 0 0 0 1 2

GREEN 0 0 1 0 0 0 1 2

HAIR 0 0 0 0 1 0 1 2

HAIR 0 0 1 0 1 0 0 2

HAIR 0 0 1 0 1 0 0 2

HAIR 0 1 1 0 0 0 0 2

HAND 1 0 1 0 0 1 1 4

HE 0 1 1 1 0 0 0 3

HEAD 0 0 1 0 1 0 0 2

HEART 0 0 1 0 1 0 0 2

HEAVY 1 0 1 0 0 ? ? 2

HOLD 1 0 1 0 0 0 ? 2

HOLD 1 0 1 0 0 0 ? 2

I 1 1 1 1 0 1 1 6

KNOW 0 0 1 0 0 0 1 2

KNOW 1 0 0 0 1 0 0 2

LAKE 0 ? 1 0 ? 0 1 2

LEAF 1 0 0 1 0 ? 1 3

LEG 1 1 0 0 0 0 0 2

LIVER 0 0 0 0 1 0 1 2

LONG 0 0 1 0 1 0 0 2

LOUSE 0 1 1 1 0 0 0 3

MAN 1 1 1 1 0 0 0 4

MANY 1 1 0 ? 1 0 0 3

MEAT 1 1 0 0 1 0 0 3

MOTHER 1 1 0 0 1 0 1 4

MOUNTAIN 0 1 0 ? 1 0 0 2

MOUNTAIN 1 0 0 ? 0 0 1 2

MOUTH 0 0 1 ? 0 1 0 2

NAME 1 1 1 0 0 0 0 3

NARROW 0 1 1 ? 0 0 0 2

NARROW 1 1 0 ? 0 0 0 2

NARROW 1 1 0 ? 0 0 0 2

NECK 0 0 1 0 1 0 0 2

NECK 0 0 1 0 1 0 0 2

NECK 1 0 0 1 0 0 0 2

NECK 1 0 1 0 0 0 0 2

NEW 1 0 1 ? 0 0 1 3

NIGHT 0 0 0 1 1 0 0 2

NIGHT 1 0 0 0 0 1 0 2

NOSE 0 0 1 0 0 1 1 3

NOT 1 1 1 1 0 0 1 5

OLD 1 1 0 1 1 ? 0 4

ONE 0 0 0 0 1 1 0 2

ONE 0 0 0 1 1 0 0 2

ONE 0 1 0 0 0 0 1 2

OTHER 0 0 1 0 ? 1 0 2

RED 0 ? 1 0 1 0 1 3

ROOT 0 1 0 1 1 0 0 3

ROPE 0 1 0 1 0 0 0 2

SALT 0 0 1 0 1 ? 0 2

SALT 1 1 0 0 0 ? 0 2

SAND 0 1 1 0 0 ? 0 2

SCRATCH 0 0 0 1 1 0 0 2

SCRATCH 0 0 0 1 1 0 0 2

SCRATCH 0 0 1 0 1 0 0 2

SCRATCH 0 1 0 0 1 0 0 2

SHARP 0 0 1 ? 1 ? 0 2

SHORT 1 0 1 ? 0 0 0 2

SKIN 0 1 0 0 1 0 0 2

SKIN 0 1 0 0 1 0 0 2

SKIN 0 1 1 0 0 0 0 2

SKIN 1 0 1 0 0 0 0 2

SKIN 0 0 0 1 0 0 1 2

SKIN 1 0 1 0 0 0 0 2

SMALL 0 0 1 1 1 0 0 3

SMALL 1 0 1 0 1 0 0 3

SMOKE 0 0 1 0 1 0 1 3

SNAKE 1 0 1 1 0 ? 0 3

SNOW 0 1 1 0 ? 0 0 2

STAR 1 1 0 ? 1 0 0 3

STICK 1 0 0 1 0 0 ? 2

STICK 1 0 1 0 0 0 ? 2

STONE 0 1 0 1 0 1 0 3

STRAIGHT 0 1 1 ? 0 0 0 2

SUN 1 0 1 0 0 0 1 3

TAIL 0 0 1 1 0 0 0 2

THAT 1 1 1 ? 1 1 0 5

THICK 0 0 1 ? 0 0 1 2

THIN 0 0 1 0 1 0 0 2

THIN 0 0 1 0 1 0 0 2

THIN 0 1 1 0 0 0 0 2

THIS 0 0 1 1 0 1 1 4

THOU 1 1 1 1 1 1 1 7

THREE 0 0 1 0 1 0 0 2

TO BITE 0 0 1 0 0 0 1 2

TO BITE 0 1 0 0 1 0 0 2

TO BLOW 0 1 1 0 0 0 0 2

TO BLOW 1 0 0 1 0 0 0 2

TO BLOW 1 1 0 0 0 0 0 2

TO BURN 1 0 0 0 1 1 0 3

TO BURN 1 0 0 1 1 0 0 3

TO BURN 1 0 1 0 0 0 1 3

TO BURN 1 1 1 0 0 0 0 3

TO CUT 1 0 1 1 0 0 0 3

TO CUT 1 1 0 1 0 0 0 3

TO CUT 1 1 1 0 0 0 0 3

TO DIE 1 0 0 1 0 ? 1 3

TO DIG 0 0 1 0 1 0 0 2

TO DIG 1 0 1 0 0 0 0 2

TO DIG 1 1 0 0 0 0 0 2

TO DRINK 0 0 1 0 0 0 1 2

TO DRINK 0 0 1 0 0 1 0 2

TO DRINK 1 0 0 0 1 0 0 2

TO DRINK 1 1 0 0 0 0 0 2

TO EAT 0 0 0 0 1 1 0 2

TO EAT 0 0 1 0 1 0 0 2

TO EAT 0 1 1 0 0 0 0 2

TO EAT 1 0 1 0 0 0 0 2

TO FALL 1 0 1 0 1 0 0 3

TO FEAR 1 ? 0 ? 1 0 0 2

TO FLOW 1 1 1 0 1 0 0 4

TO FREEZE 1 0 1 1 ? 0 0 3

TO GIVE 1 1 1 0 1 0 1 5

TO HEAR 1 1 1 0 1 ? 0 4

TO HIT 1 1 1 0 0 0 0 3

TO HUNT 0 1 1 ? 0 0 0 2

TO KILL 1 0 0 1 1 0 0 3

TO LAUGH 1 1 0 0 0 0 0 2

TO LAUGH 1 1 0 0 0 0 0 2

TO LIE 0 1 1 0 1 0 0 3

TO LIVE 0 0 0 1 1 0 0 2

TO PULL 1 0 1 0 1 1 0 4

TO SAY 1 0 1 0 0 0 0 2

TO SEE 0 1 1 1 0 ? 0 3

TO SEW 0 1 0 0 1 0 0 2

TO SEW 1 0 1 0 0 0 0 2

TO SING 1 1 0 0 0 0 0 2

TO SIT 0 0 0 1 1 0 0 2

TO SLEEP 0 0 0 1 0 0 1 2

TO SPIT 1 0 1 1 1 ? 0 4

TO SPLIT 1 1 0 0 1 ? 0 3

TO STAB 1 1 0 0 ? 0 1 3

TO STAND 0 1 0 0 1 ? 0 2

TO SUCK 0 0 1 1 1 0 ? 3

TO SWIM 0 1 1 0 1 0 0 3

TO THINK 0 0 1 1 0 0 0 2

TO THROW 0 1 0 0 1 0 0 2

TO TIE 1 0 0 1 0 0 0 2

TO TIE 1 0 1 0 0 0 0 2

TO TIE 1 1 0 0 0 0 0 2

TO TURN 0 1 0 0 1 0 0 2

TO TURN 1 0 0 0 1 0 0 2

TO WASH 1 0 0 0 1 0 0 2

TONGUE 1 0 1 0 0 1 0 3

TOOTH 0 0 1 ? 1 1 0 3

TREE 0 0 1 0 1 0 0 2

TWO 0 0 0 1 1 0 0 2

TWO 1 0 1 0 0 0 0 2

WATER 1 1 0 0 1 0 0 3

WE 1 0 1 1 1 0 1 5

WET 1 0 1 0 0 0 0 2

WHAT 1 1 1 1 ? 0 0 4

WHITE 0 1 0 0 0 1 0 2

WHO 1 1 1 0 0 1 1 5

WIDE 0 1 1 ? 0 0 0 2

WIFE 1 0 1 0 ? ? 0 2

WIFE 1 0 1 0 ? ? 0 2

WING 0 1 1 0 0 1 0 3

WOMAN 1 0 0 0 0 0 1 2

WORM 1 1 1 0 0 1 0 4

YE 0 1 ? 1 0 1 1 4

YEAR 0 0 1 0 1 0 0 2

YEAR 0 1 0 0 0 0 1 2

YEAR 1 1 0 0 0 0 0 2

YELLOW, WIPE, WIND, WARM, TO WALK, TO VOMIT, 1*

TO SWELL, TO SQUEEZE, TO SMELL, TO RUB, TO RAIN, 1*

TO PUSH, TO PLAY, TO FLY, TO FLOAT, TO FIGHT, TO COUNT, 1*

TO COME, TO BREATHE, THEY, SMOOTH, SKY, SEED, SEA, 1*

ROTTEN, ROAD, RIVER, RIGHT (HAND), RIGHT (CORRECT), 1*

PERSON, NEAR, LEFT, ICE, HUSBAND, GUTS, FRUIT, 1*

FLOWER, FEW, FAR, DIRTY, BAD, ANIMAL, WOOD, DULL. 1*
